# Supplementary material for: Modulation of RhoA GTPase Activity Sensitizes Human Cervix Carcinoma Cells to γ‐Radiation by Attenuating DNA Repair Pathways
Source: Hindawi journal article supplement (doi:10.1155/2016/6012642), 2015-11-15
Supplement: f1 [file 6012642.f1.pdf]

## Supplementary Figures

## Supplementary Figure S1

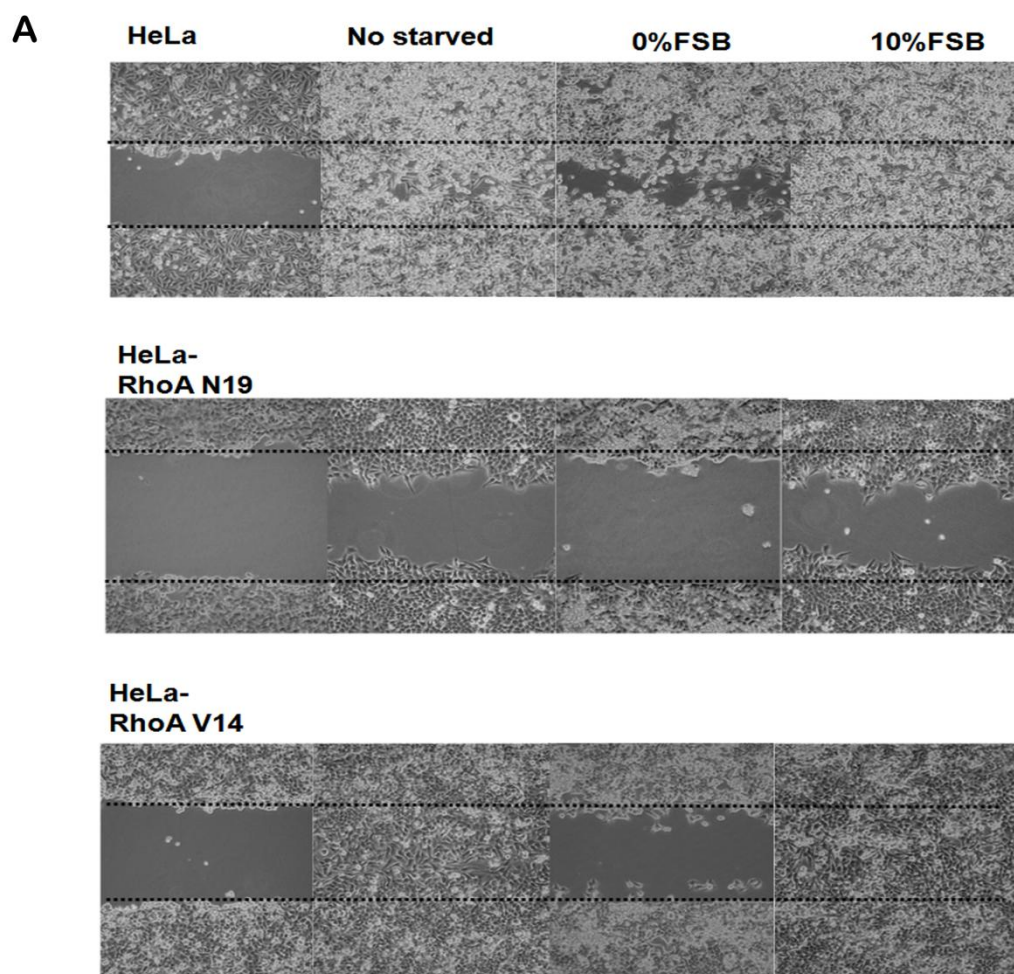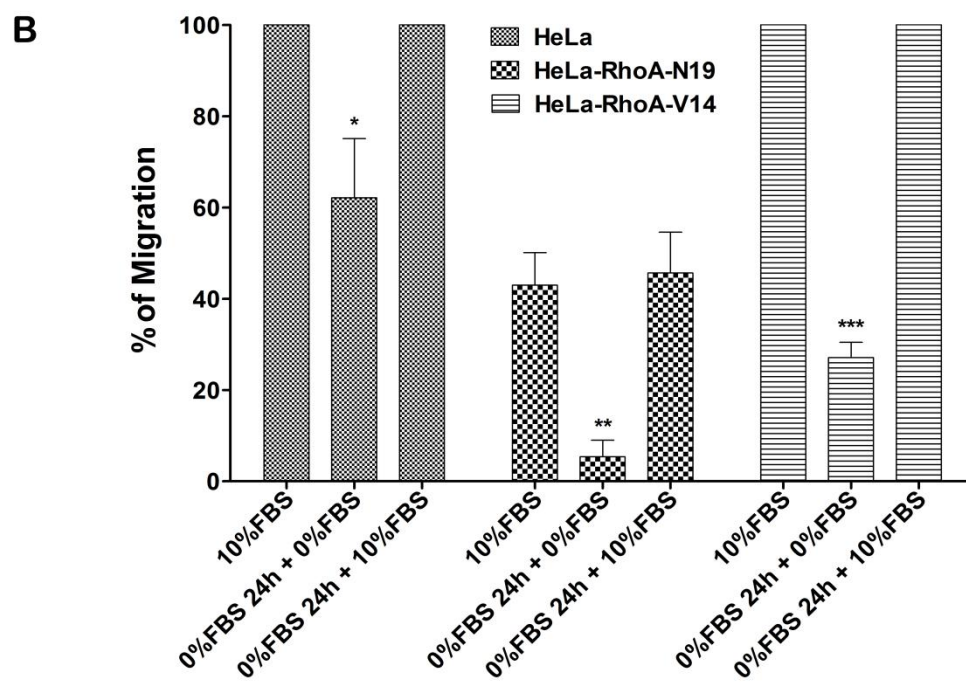

**Supplementary Figure S1.** Migration *in vitro* (by scratch assays) of HeLa cells expressing RhoA mutants. Confluent cell monolayers were scratched using micropipette tips, cells were allowed to migrate for 24h (at 37°C with 5% CO<sub>2</sub>), and migration rates were calculated from light microscopy images of fixed cells, using the Cell-F software (Olympus). Cells were either grown and allowed to migrate in medium with 10% FBS ('not starved'), or serum-starved (0% FBS) for 24h prior to scratch assays, and then allowed to migrate in medium with 0% or 10% FBS for additional 24h. A. Images of scratch assays using parental HeLa cells or HeLa-RhoA-V14 HeLa-RhoA-N19 clonal cell lines. B. Quantification of scratch assay data. Values represent mean  $\pm$  SD from three independent experiments. \*P<0.05, \*\*P<0.001 and \*\*\*P<0.005 versus 'not starved' (by ANOVA).

## Supplementary Figure S2

A

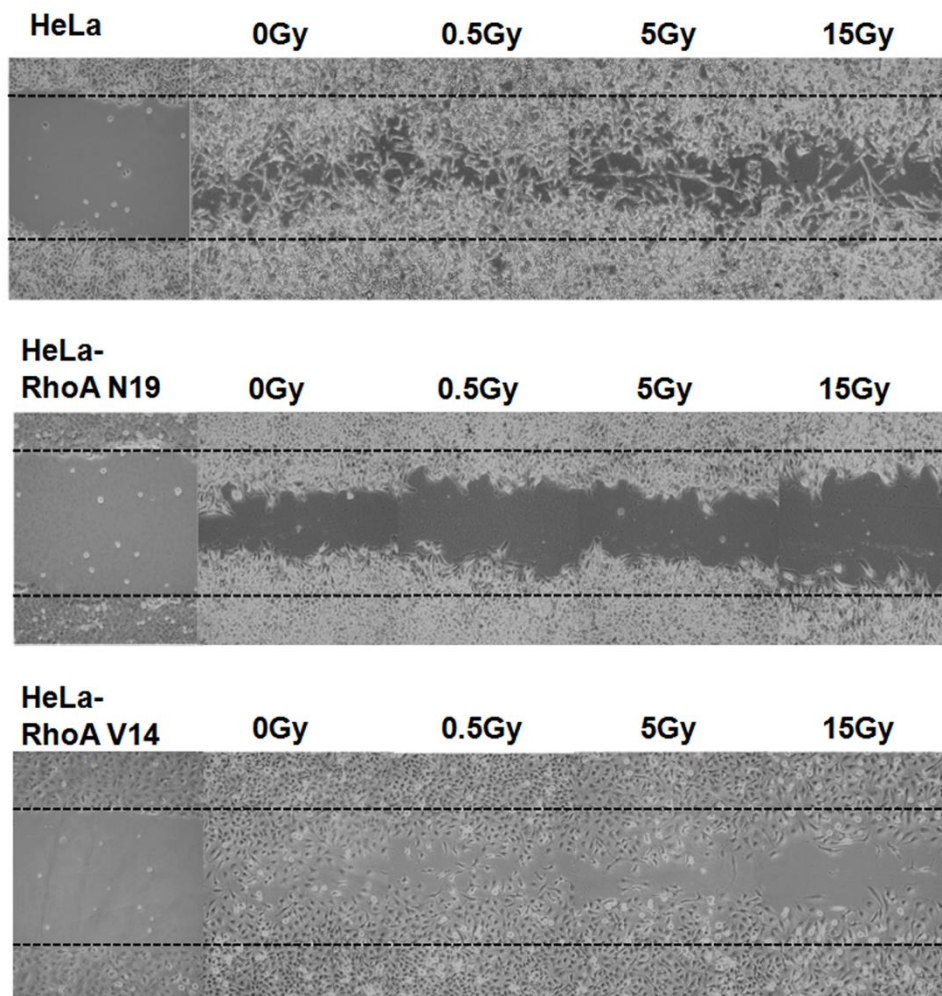

B

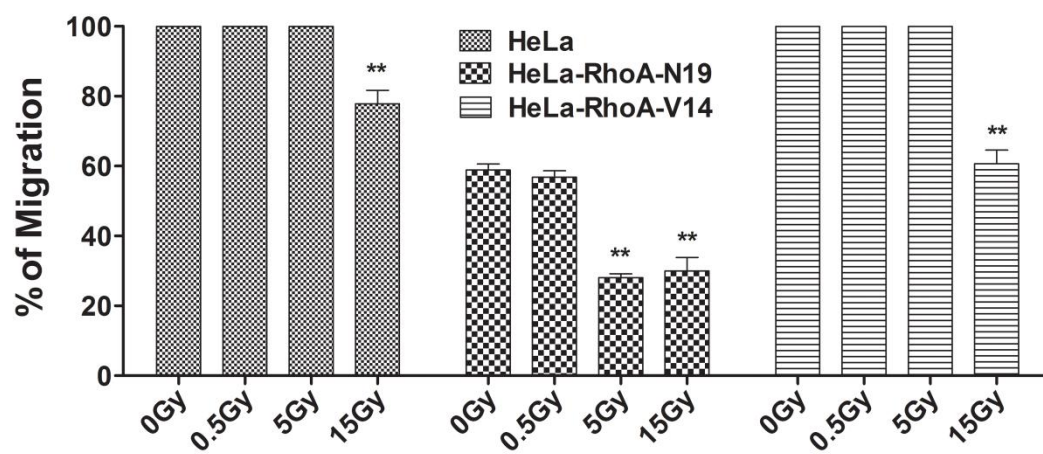

**Supplementary Figure S2.** Migration *in vitro* (by scratch assays) of HeLa cells expressing RhoA mutants, after  $\gamma$ -irradiation. Confluent cell monolayers were scratched using micropipette tips, cells were exposed to different doses of  $\gamma$ -radiation (0-15 Gy condition), and then allowed to migrate for by 24 h (at 37°C with 5% CO<sub>2</sub>) in medium containing 10% FBS. Then, migration rates were calculated from light microscopy images of fixed cells, using Cell-F software (Olympus). A. Images of scratch assays of parental HeLa and HeLa-RhoA clonal cell lines. B. Quantification of scratch assay data. Values represent mean  $\pm$  SD from three independent experiments. \*P<0.05 and \*\*P<0.001 relative to untreated (0 Gy) (by ANOVA).
